# Supplementary material for: A multifunctional double walled zirconium metal–organic framework: high performance for CO2 adsorption and separation and detecting explosives in the aqueous phase
Source: Royal Society of Chemistry journal article supplement (doi:10.1039/d0ta04778c), 2020-01-01
Supplement: d0ta04778c1.pdf [file d0ta04778c1.pdf]

## Electronic Supplementary Information

# A Multifunctional Double Walled Zirconium Metal-Organic Framework: High Performance of CO<sub>2</sub> Adsorption and Separation, Detecting Explosives in Aqueous Phase

Xiaodong Sun,<sup>a,c</sup> Xu Li,<sup>b</sup> Shuo Yao,<sup>a</sup> Rajamani Krishna,<sup>d</sup> Jiaming Gu,<sup>a</sup> Guanghua Li,<sup>a</sup> Yunling Liu<sup>\*a</sup>

<sup>a</sup> State Key Laboratory of Inorganic Synthesis and Preparative Chemistry, College of Chemistry, Jilin University, Changchun 130012, P. R. China

<sup>b</sup> School of Chemical Engineering and Light Industry, Guangdong University of Technology, Guangzhou 510006, Guangdong, P. R. China.

<sup>c</sup> Institute of Clean Energy Chemistry, Key Laboratory for Green Synthesis and Preparative Chemistry of Advanced Materials, College of Chemistry, Liaoning University, Shenyang 110036, China

<sup>d</sup> Van't Hoff Institute For Molecular Sciences, University of Amsterdam, Science Park 904, 1098 XH Amsterdam, The Netherlands

### Table of contents

| Contents                                                          | Page Number |
|-------------------------------------------------------------------|-------------|
| 1. XRD and TGA characterization of <b>JLU-Liu45</b>               | 2           |
| 2. Structure description of <b>JLU-Liu45</b>                      | 3-4         |
| 3. Stability test of <b>JLU-Liu45</b>                             | 5-6         |
| 4. Gas sorption and separation studies                            | 7-8         |
| 5. Calculation procedures of selectivity from IAST                | 8-9         |
| 6. Transient breakthrough of mixtures in fixed bed adsorbers      | 10-11       |
| 7. Computational simulation studies of CO <sub>2</sub> adsorption | 11          |
| 8. Detection of selected nitroaromatics                           | 11-16       |
| 9. Tables                                                         | 17-22       |
| 10. References                                                    | 22-24       |

## 1. XRD and TGA characterization of JLU-Liu45

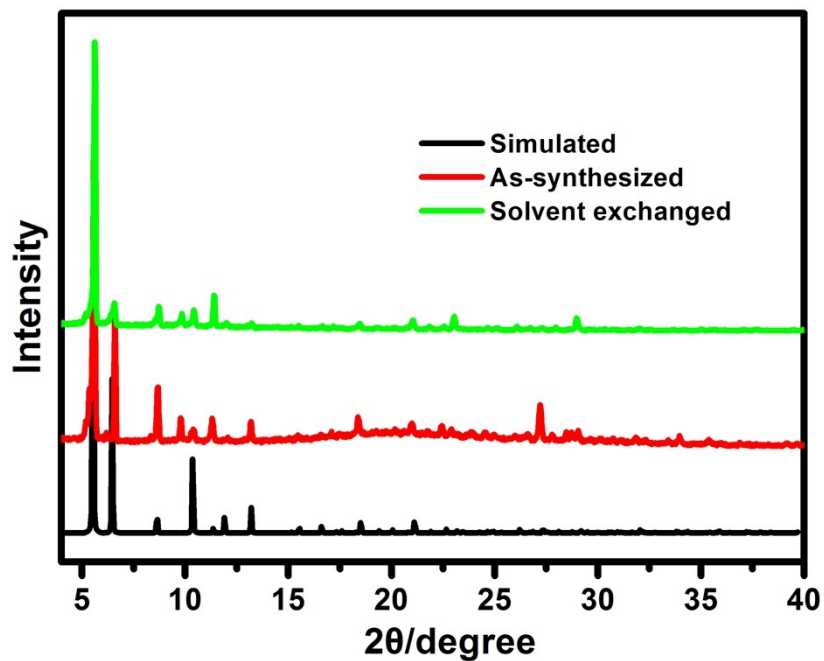

Fig. S1 PXRD patterns of JLU-Liu45 for simulated, as-synthesized and  $\text{CH}_3\text{CN}$  solvent exchanged sample.

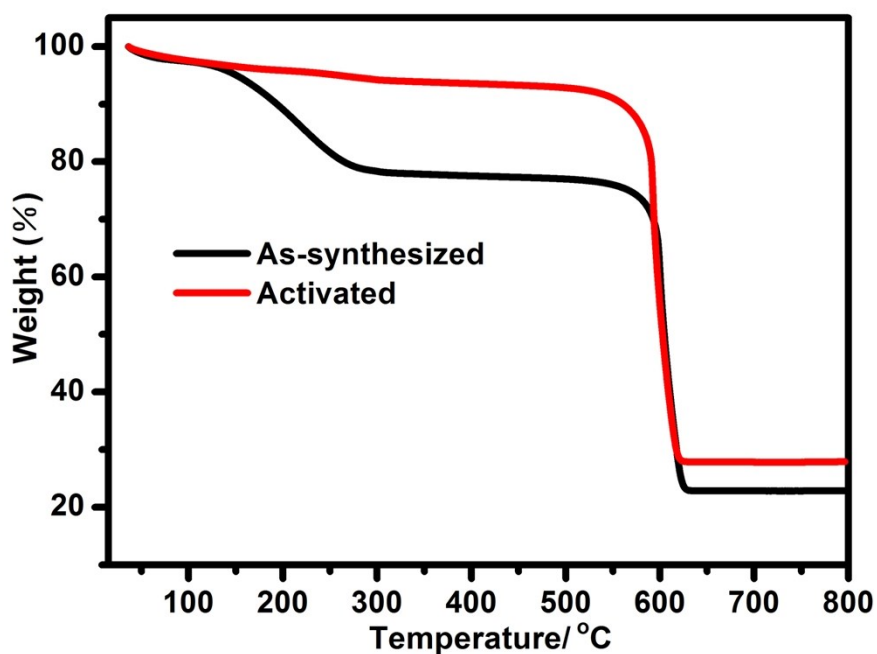

Fig. S2 TGA curves of JLU-Liu45 for the as-synthesized and activated sample.

## 2. Structure description of JLU-Liu45

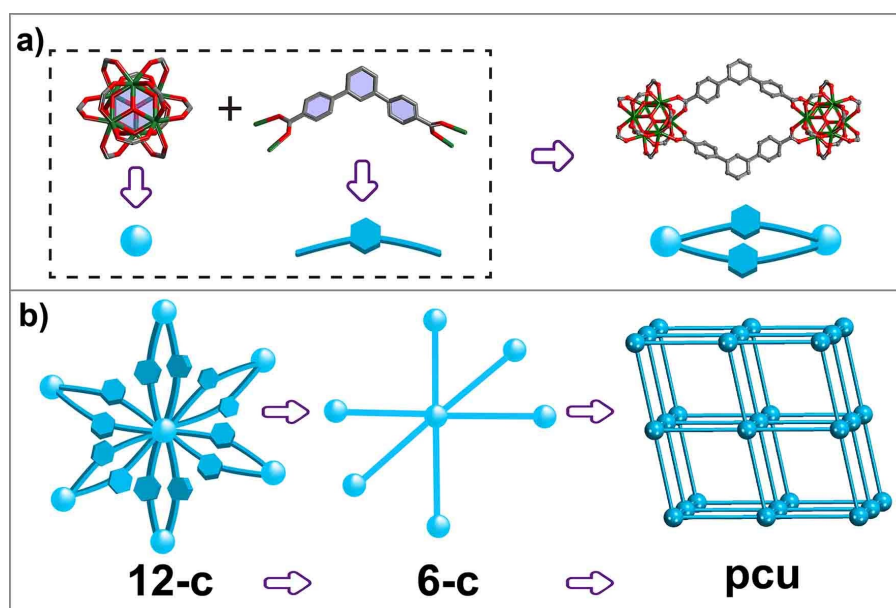

**Fig. S3** Double walled building blocks assembled by two  $\text{Zr}_6\text{O}_4(\text{OH})_4(\text{CO}_2)_{12}$  SBUs and two C2-symmetric V-shaped  $\text{H}_2\text{DCPB}$  ligands (a); the 12-c building blocks with double wall can be simplified to a 6-c node and form the 6-c network with pcu topology (b). (Color scheme: carbon = grey; oxygen = red; zirconium = dark green).

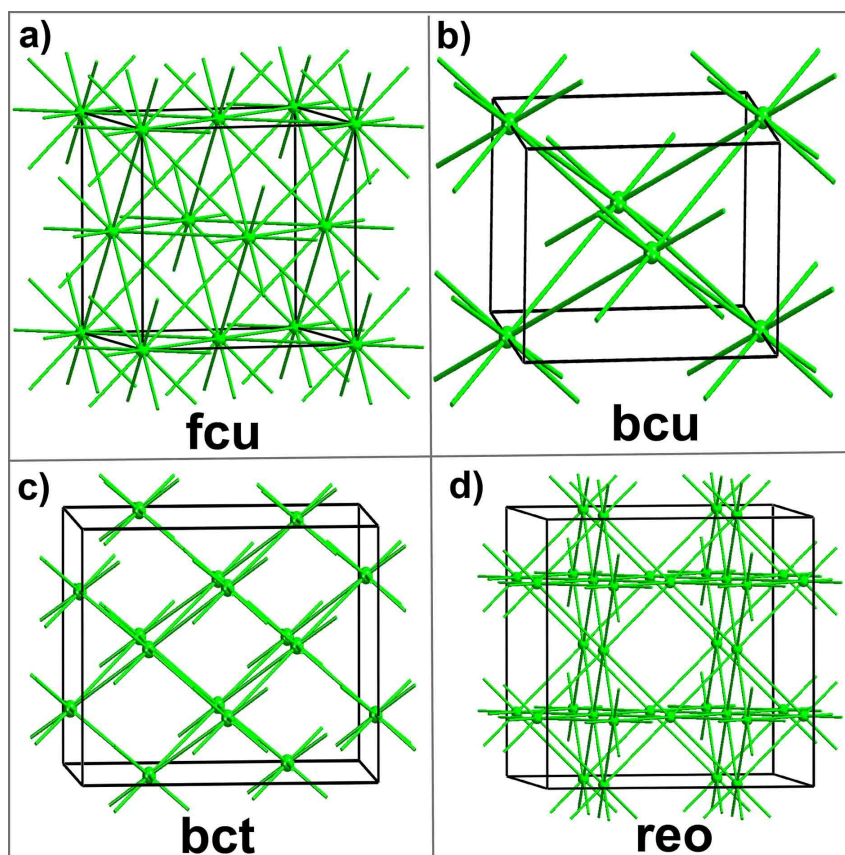

**Fig. S4** Representative network topologies in reported Zr-MOFs constructed by dicarboxylate ligands.

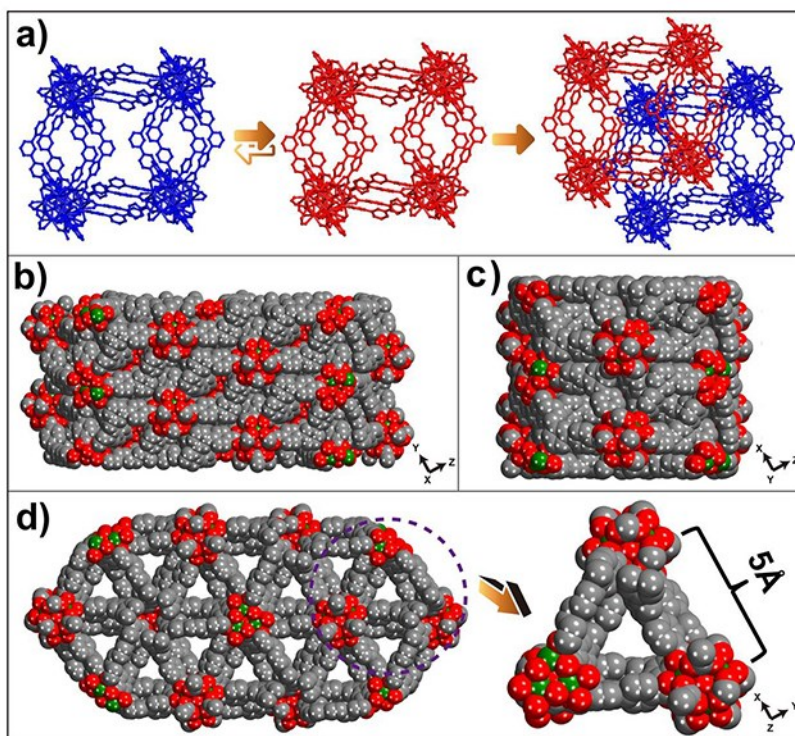

**Fig. S5** (a) The formation of 3D interpenetrated framework; (b), (c) and (d) space-filling representations of the structure of **JLU-Liu45** viewed along the [100], [010] and [001] directions, respectively, and the dimension of triangle windows about 5 Å considering the van der Waals radius.

### 3. Stability test of JLU-Liu45

The thermal and chemical stability of **JLU-Liu45** was examined. The thermal stability was assessed by thermo gravimetric analysis (TGA) under an atmospheric environment. The high decomposition temperature which can reach up to 550 °C reveals the notable thermal stability of the **JLU-Liu45** material. On the other hand, to estimate the chemical stability of the framework, the as-synthesized **JLU-Liu45** samples were immersed in HCl and NaOH aqueous solutions with a pH range from 0 to 11, and different organic solutions at room temperature for 48 h. The PXRD patterns were completely maintained from the harsh chemical environment. Although slight differences of the peak strength can be observed, the N<sub>2</sub> adsorption measurement of the samples after stability test demonstrated that **JLU-Liu45** exhibited excellent chemical stability. PXRD patterns for **JLU-Liu45** sample before and after measuring the water adsorption isotherm also indicate its water stability. Because of the following reasons, **JLU-Liu45** exhibits commendable stability: (1) Zr<sup>4+</sup> has high charge density, polarizes the O atoms of the carboxylate groups to form strong Zr-O bonds with significant covalent character. (2) Double walled framework can improve the stability of the material. (3) Interpenetration framework can minimize the empty space and further enhance the stability of the material. In conclusion, **JLU-Liu45** is highly robust and deserves further exploring in practical applications.

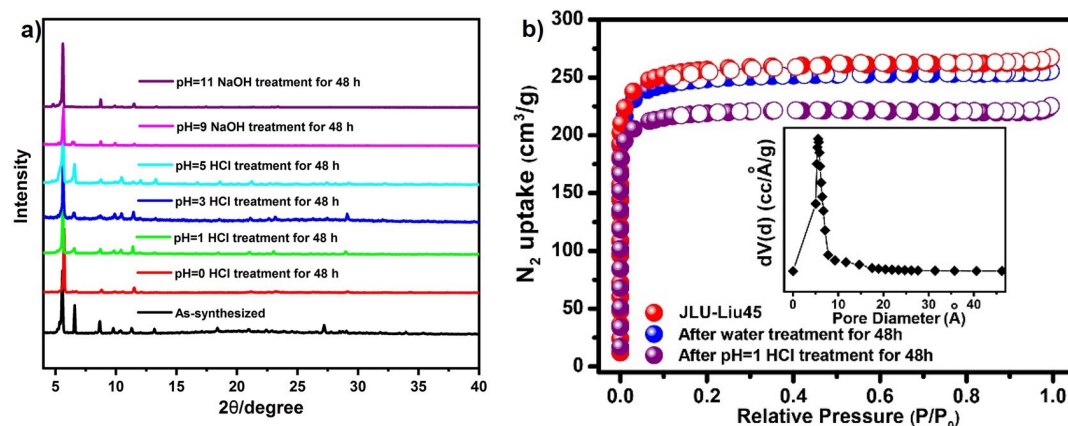

**Fig. S6** (a) PXRD patterns and (b) N<sub>2</sub> isotherms of **JLU-Liu45** after immersed in aqueous solutions with different pH values at room temperature for 48 h and the corresponding pore size distribution curve calculated using DFT method (insert).

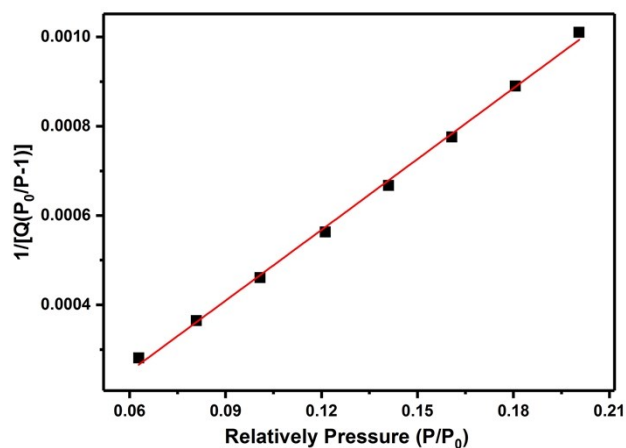

**Fig. S7** The linear fitting curve for calculating BET surface areas of **JLU-Liu45**.

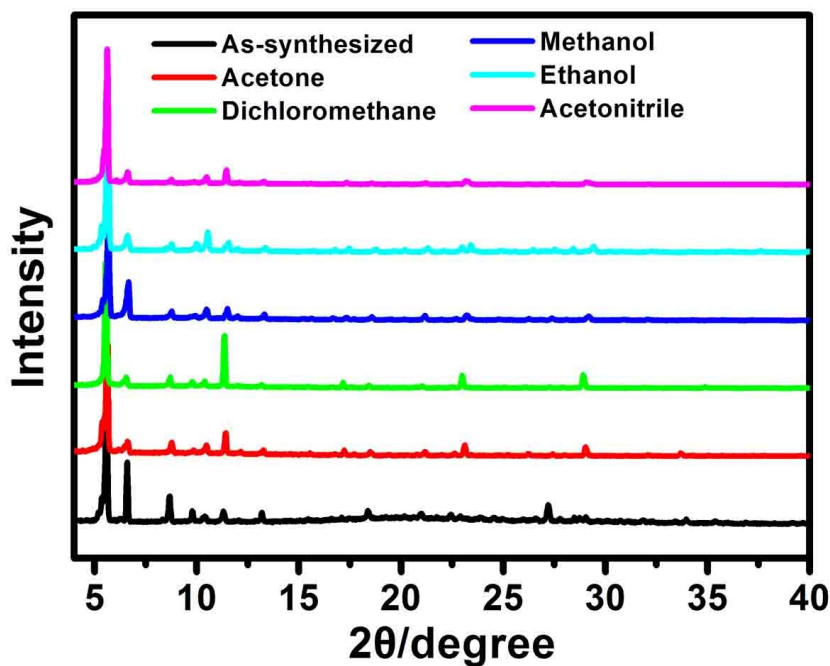

**Fig. S8** PXRD patterns of JLU-Liu45 for as-synthesized and the sample immersed in different organic solutions at room temperature for 48 h.

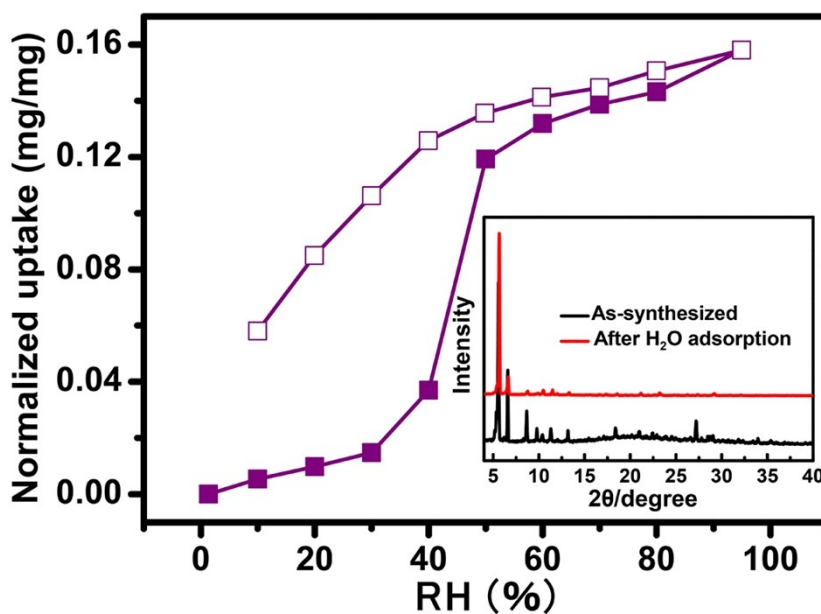

**Fig. S9** Water adsorption isotherm of JLU-Liu45 (experimental condition: T = 298 K, P = 1 bar; N<sub>2</sub> carrier gas). PXRD patterns (insert graph) for JLU-Liu45 sample before and after measuring the water adsorption isotherm.

#### 4. Gas adsorption and separation studies

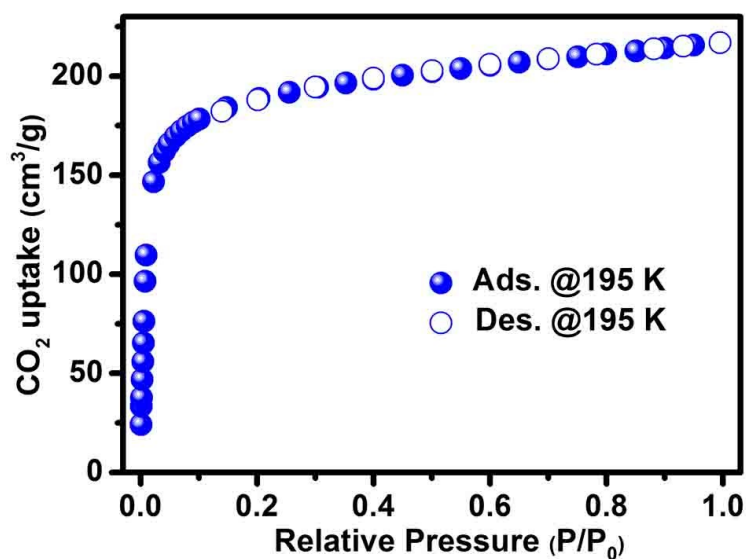

Fig. S10 The CO<sub>2</sub> adsorption isotherm for JLU-Liu45 at 195 K under 1 bar.

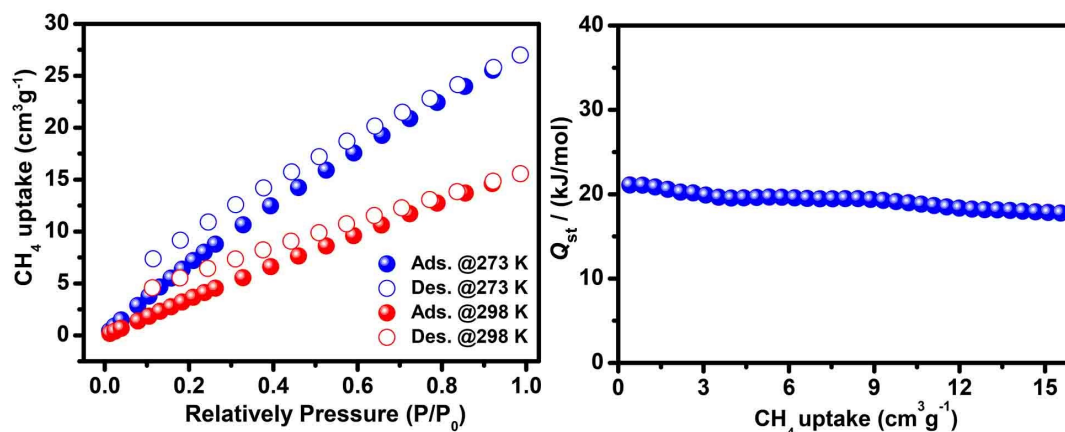

Fig. S11 The CH<sub>4</sub> isotherms for JLU-Liu45 at 273 and 298 K under 1 bar and  $Q_{st}$  of CH<sub>4</sub> for JLU-Liu45.

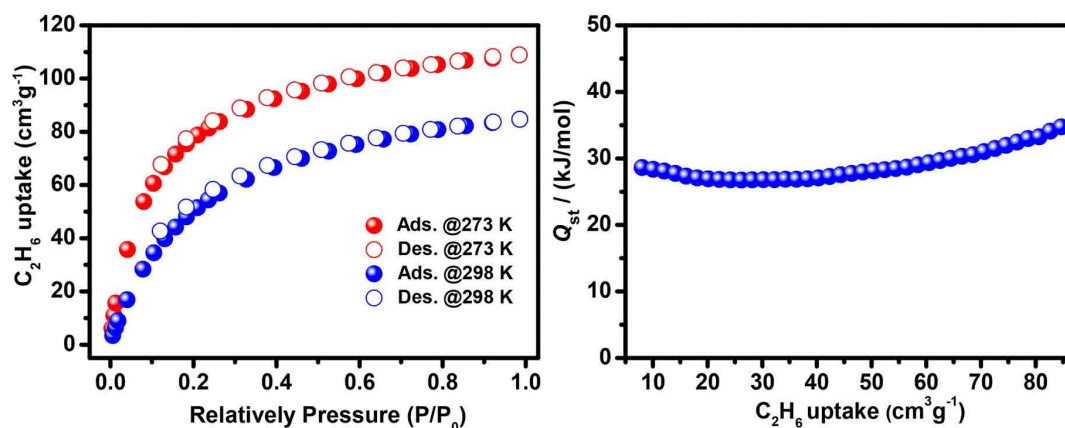

Fig. S12 The C<sub>2</sub>H<sub>6</sub> isotherms for JLU-Liu45 at 273 and 298 K under 1 bar and  $Q_{st}$  of C<sub>2</sub>H<sub>6</sub> for JLU-Liu45.

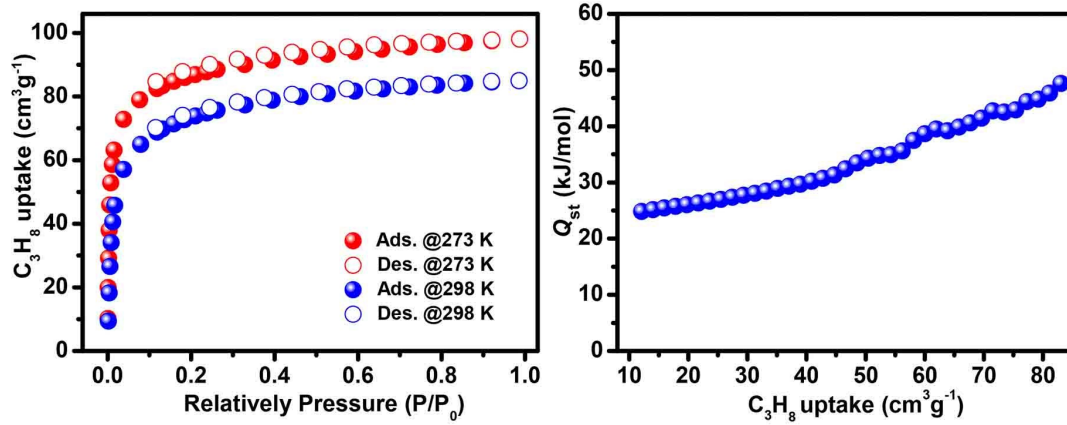

Fig. S13 The  $C_3H_8$  isotherms for **JLU-Liu45** at 273 and 298 K under 1 bar and  $Q_{st}$  of  $C_3H_8$  for **JLU-Liu45**.

## 5. Calculation procedures of selectivity from IAST

The measured experimental data is excess loadings ( $q^{ex}$ ) of the pure components  $N_2$ ,  $CO_2$ ,  $CH_4$ ,  $C_2H_6$  and  $C_3H_8$  for **JLU-Liu45**, which should be converted to absolute loadings ( $q$ ) firstly.

$$q = q^{ex} + \frac{pV_{pore}}{ZRT}$$

Here  $Z$  is the compressibility factor. The Peng-Robinson equation was used to estimate the value of compressibility factor to obtain the absolute loading, while the measure pore volume  $0.38 \text{ cm}^3 \text{ g}^{-1}$  is also necessary.

The dual-site Langmuir-Freundlich equation is used for fitting the isotherm data at 298 K.

$$q = q_{m_1} \times \frac{b_1 \times p^{1/n_1}}{1 + b_1 \times p^{1/n_1}} + q_{m_2} \times \frac{b_2 \times p^{1/n_2}}{1 + b_2 \times p^{1/n_2}}$$

Here  $p$  is the pressure of the bulk gas at equilibrium with the adsorbed phase (kPa),  $q$  is the adsorbed amount per mass of adsorbent ( $\text{mol kg}^{-1}$ ),  $q_{m_1}$  and  $q_{m_2}$  are the saturation capacities of sites 1 and 2 ( $\text{mol kg}^{-1}$ ),  $b_1$  and  $b_2$  are the affinity coefficients of sites 1 and 2 ( $1/\text{kPa}$ ),  $n_1$  and  $n_2$  are the deviations from an ideal homogeneous surface.

The selectivity of preferential adsorption of component 1 over component 2 in a mixture containing 1 and 2, perhaps in the presence of other components too, can be formally defined as

$$S = \frac{q_1/q_2}{p_1/p_2}$$

$q_1$  and  $q_2$  are the absolute component loadings of the adsorbed phase in the mixture. These component loadings are also termed the uptake capacities. We calculate the values of  $q_1$  and  $q_2$  using the Ideal Adsorbed Solution Theory (IAST) of Myers and Prausnitz.



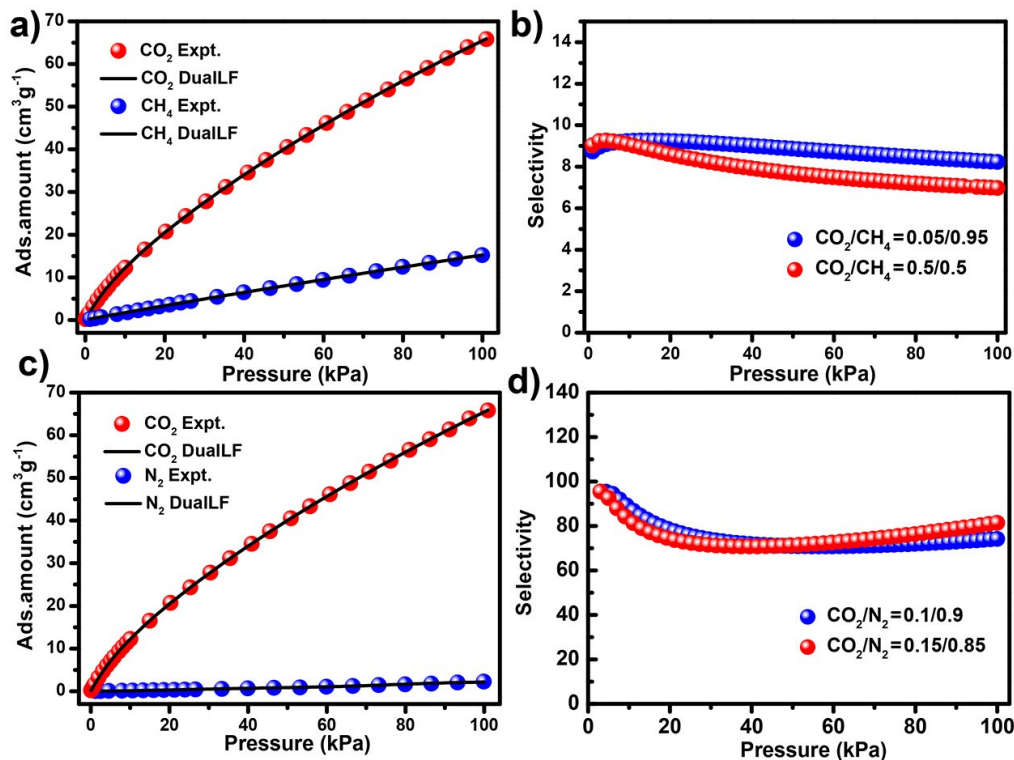

**Fig. S14** CO<sub>2</sub>, CH<sub>4</sub> and N<sub>2</sub> adsorption isotherms at 298 K along with the dual-site Langmuir Freundlich (DSLFF) fits (a and c); gas mixture adsorption selectivity are predicted by IAST at 298 K and 100 kPa for JLU-Liu45 (b and d).

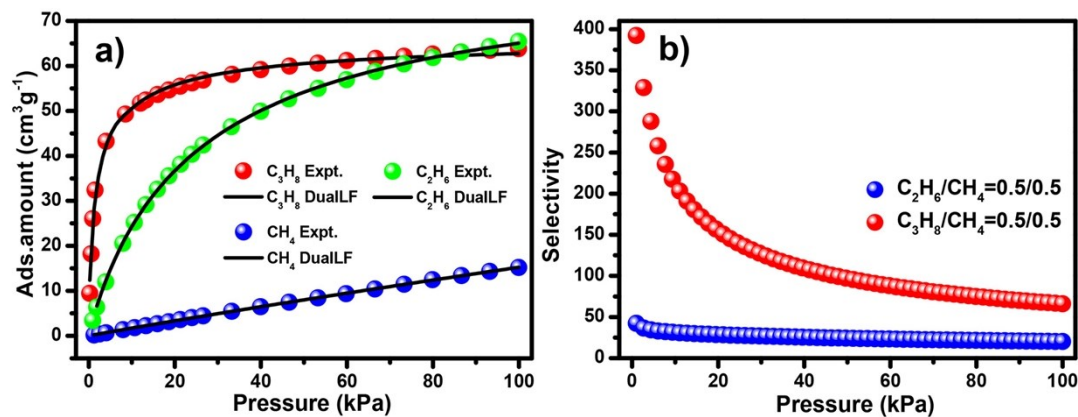

**Fig. S15** CH<sub>4</sub>, C<sub>2</sub>H<sub>6</sub> and C<sub>3</sub>H<sub>8</sub> adsorption isotherms at 298 K along with the dual-site Langmuir Freundlich (DSLFF) fits (a); gas mixture adsorption selectivity are predicted by IAST at 298 K and 100 kPa for JLU-Liu45 (b).

## 6. Transient breakthrough of mixtures in fixed bed adsorbers

The performance of industrial fixed bed adsorbers is dictated by a combination of adsorption selectivity and uptake capacity. For a proper evaluation of the separation performance, we performed transient breakthrough simulations using the simulation methodology described in the literature. For the breakthrough simulations, the following parameter values were used: length of packed bed,  $L = 0.3$  m; voidage of packed bed,  $\varepsilon = 0.4$ ; superficial gas velocity at inlet,  $u = 0.04$  m/s. The transient breakthrough simulation results are presented in terms of a *dimensionless* time,  $\tau$ , defined by dividing

$$\frac{L\varepsilon}{u}$$

the actual time,  $t$ , by the characteristic time,  $u$ .

### Notation

|          |                                                                                             |
|----------|---------------------------------------------------------------------------------------------|
| $c_i$    | molar concentration of species $i$ in gas mixture at exit of adsorber, mol m <sup>-3</sup>  |
| $c_{i0}$ | molar concentration of species $i$ in gas mixture at inlet of adsorber, mol m <sup>-3</sup> |
| $L$      | length of packed bed adsorber, m                                                            |
| $t$      | time, s                                                                                     |
| $u$      | superficial gas velocity in packed bed, m s <sup>-1</sup>                                   |

### Greek letters

|        |                     |
|--------|---------------------|
| $\tau$ | time, dimensionless |
|--------|---------------------|

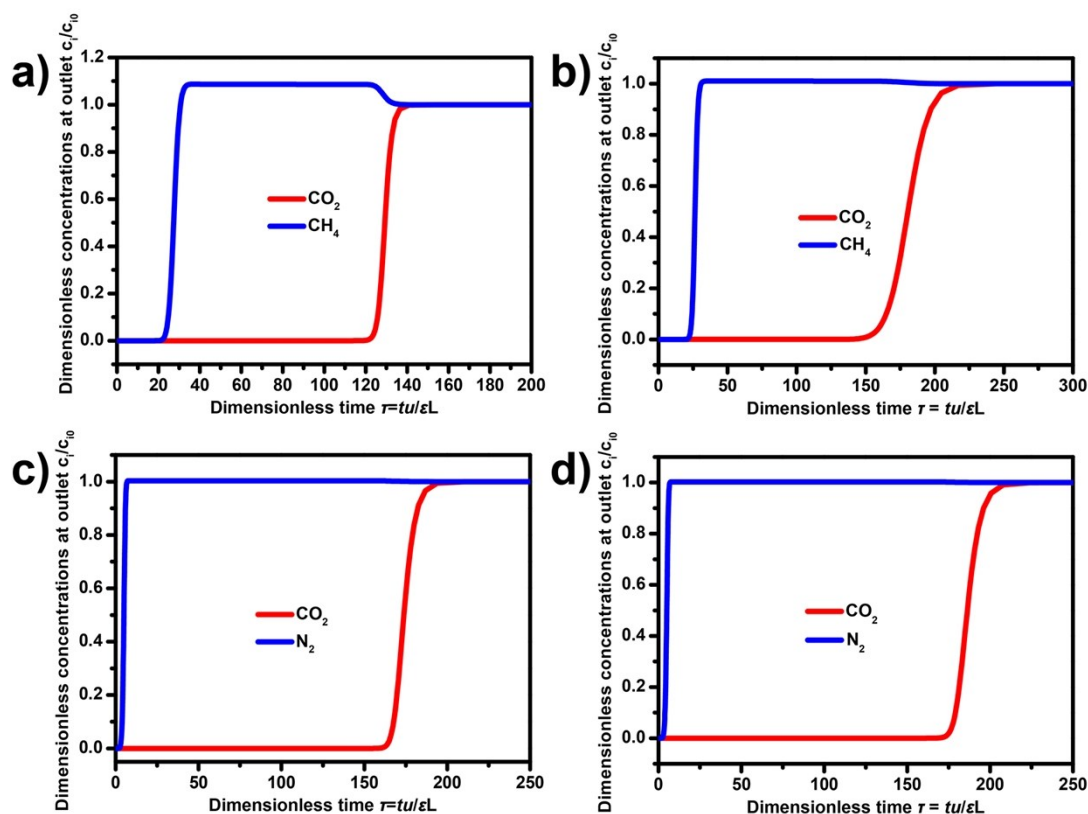

**Fig. S16** Transient breakthrough simulations for separation of 50/50 and 5/95 (a and b) CO<sub>2</sub>/CH<sub>4</sub>, 15/85 and 10/90 (c and d) CO<sub>2</sub>/N<sub>2</sub> mixtures containing. The total inlet pressure is 100 kPa. The y-axis is the dimensionless concentrations at the exit, normalized with respect to the inlet concentrations.

## 7. Computational simulation studies of CO<sub>2</sub> adsorption

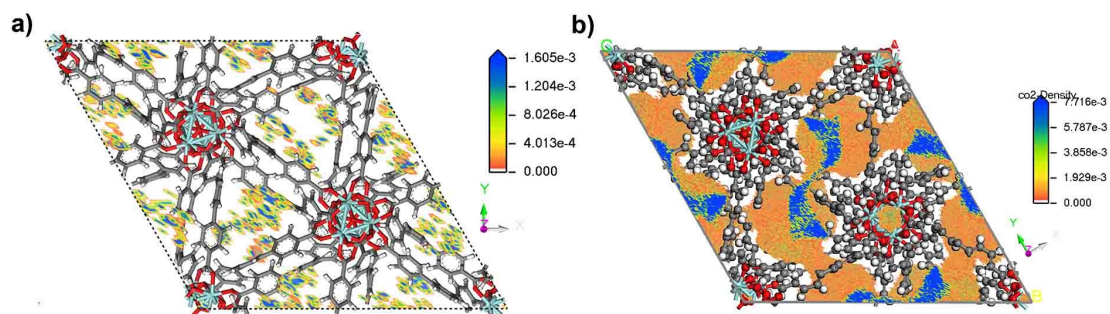

**Fig. S17** Density distribution of the center-of-mass of CO<sub>2</sub> molecules in one unit cell of **JLU-Liu45** framework at 298 K and 1 bar simulated by GCMC method (a and b).

## 8. Detection of selected nitroaromatics

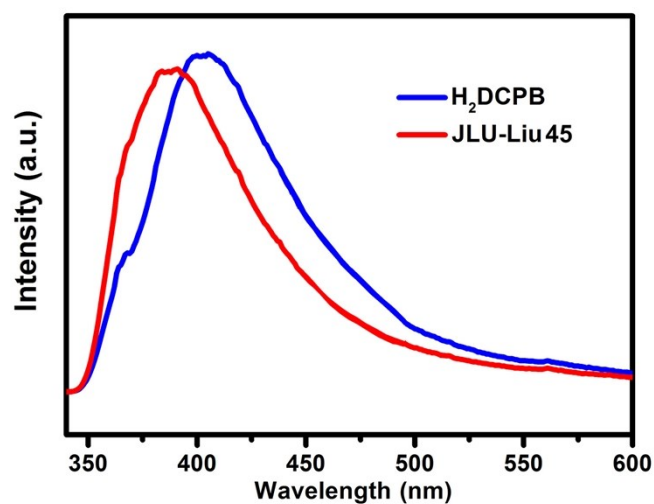

**Fig. S18** Solid-state photoluminescent spectra of **JLU-Liu45** and free **H<sub>2</sub>DCPB** ligand excited at 323 nm at room temperature.

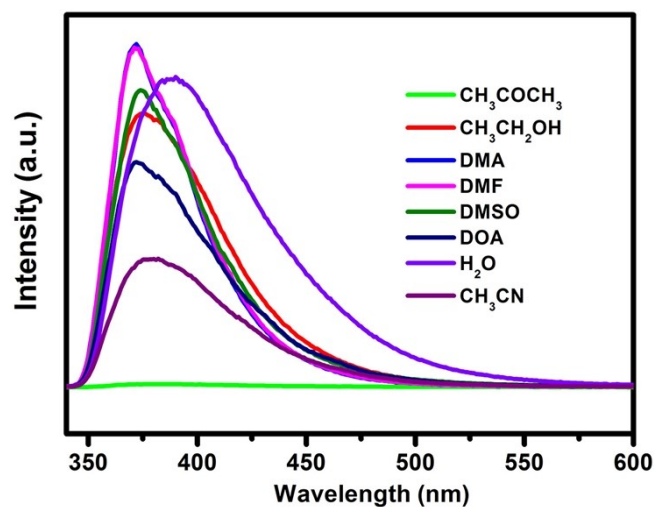

**Fig. S19** Photoluminescent spectra of **JLU-Liu45** dispersed in different solvents excited at 323 nm.

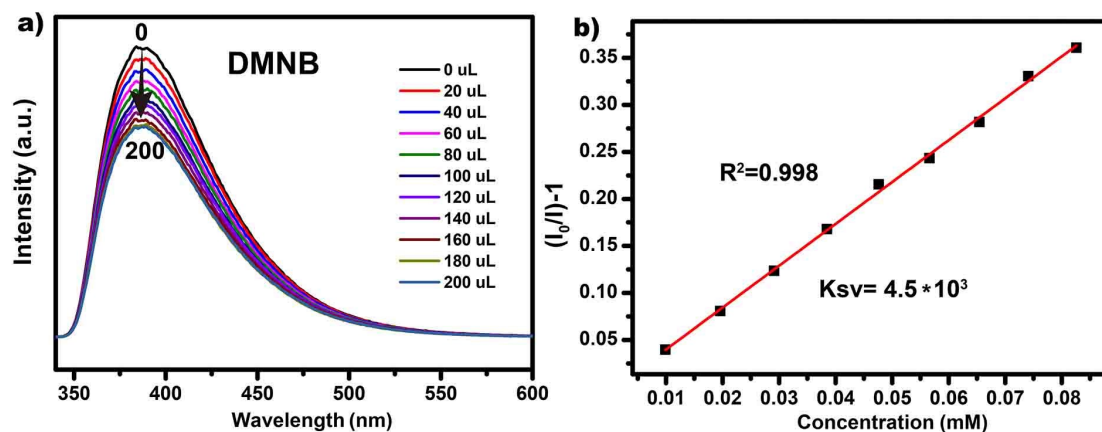

Fig. S20 a) Effect on the emission spectra of JLU-Liu45 dispersed in water upon the incremental addition of 200  $\mu\text{L}$  (1 mM, 20  $\mu\text{L}$  addition each time) aqueous solution of DMNB. b) SV plot of DMNB.

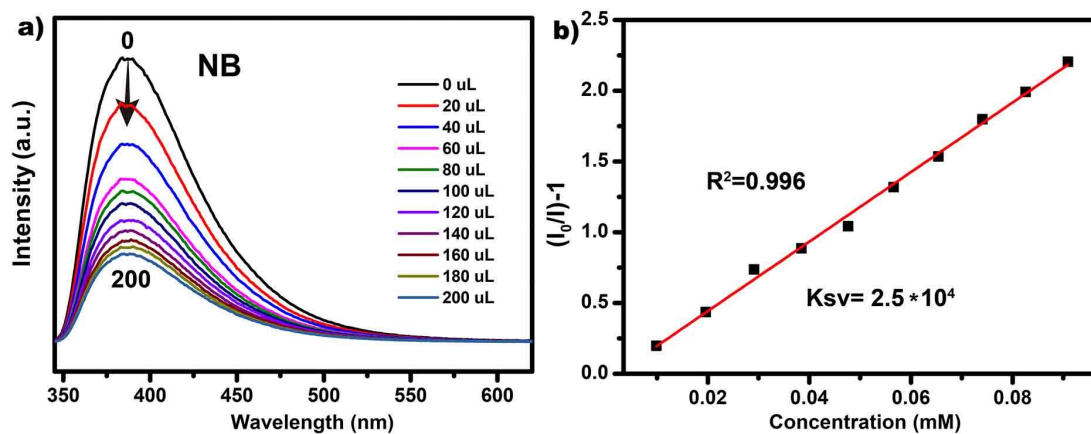

Fig. S21 a) Effect on the emission spectra of JLU-Liu45 dispersed in water upon the incremental addition of 200  $\mu\text{L}$  (1 mM, 20  $\mu\text{L}$  addition each time) aqueous solution of NB. b) SV plot of NB.

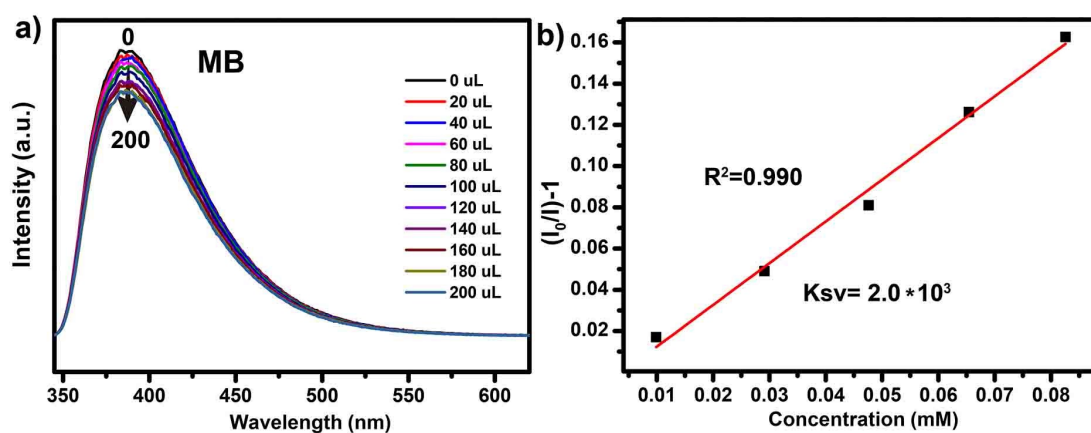

Fig. S22 a) Effect on the emission spectra of JLU-Liu45 dispersed in water upon the incremental addition of 200  $\mu\text{L}$  (1 mM, 20  $\mu\text{L}$  addition each time) aqueous solution of MB. b) SV plot of MB.

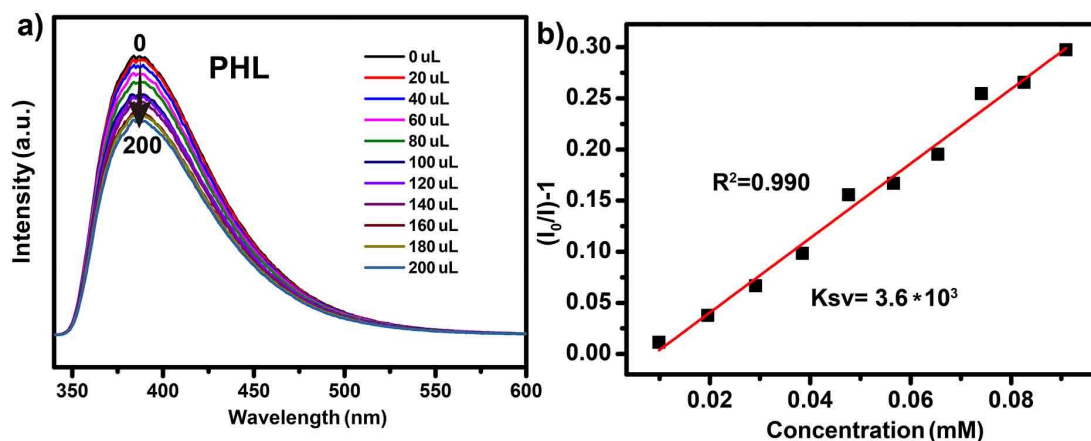

Fig. S23 a) Effect on the emission spectra of JLU-Liu45 dispersed in water upon the incremental addition of 200  $\mu\text{L}$  (1 mM, 20  $\mu\text{L}$  addition each time) aqueous solution of PHL. b) SV plot of PHL.

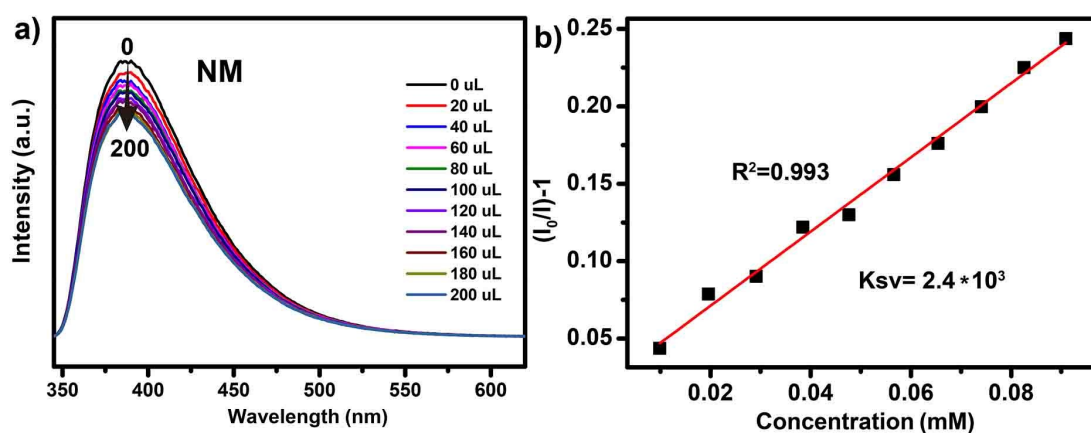

Fig. S24 a) Effect on the emission spectra of JLU-Liu45 dispersed in water upon the incremental addition of 200  $\mu\text{L}$  (1 mM, 20  $\mu\text{L}$  addition each time) aqueous solution of NM. b) SV plot of NM.

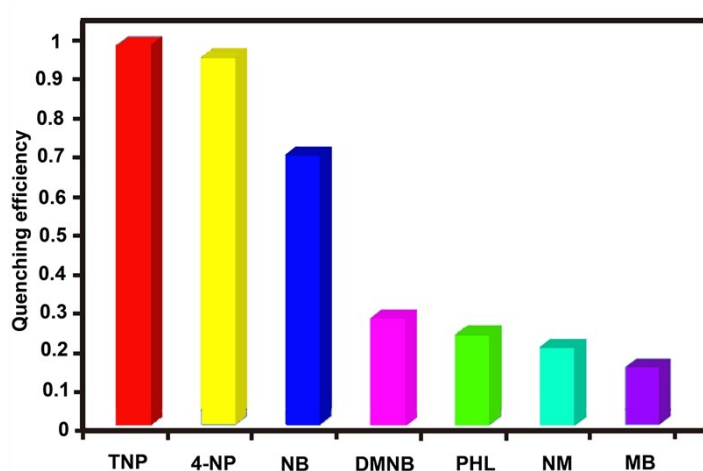

Fig. S25 The fluorescence quenching efficiency for different analytes.

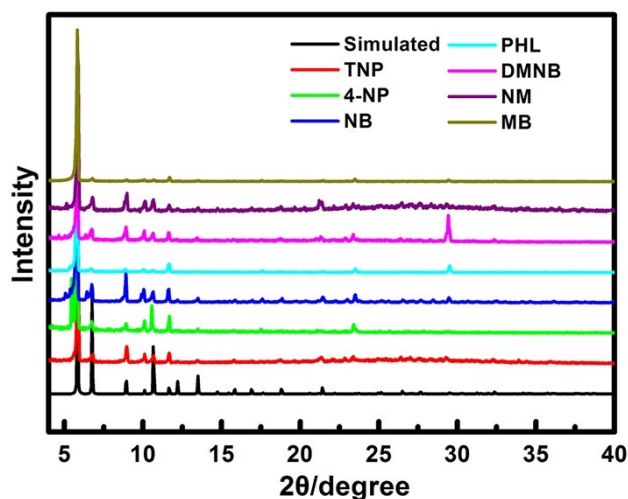

**Fig. S26** Powder X-ray diffraction (PXRD) patterns of JLU-Liu45 after the detection of antibiotics and nitroaromatics.

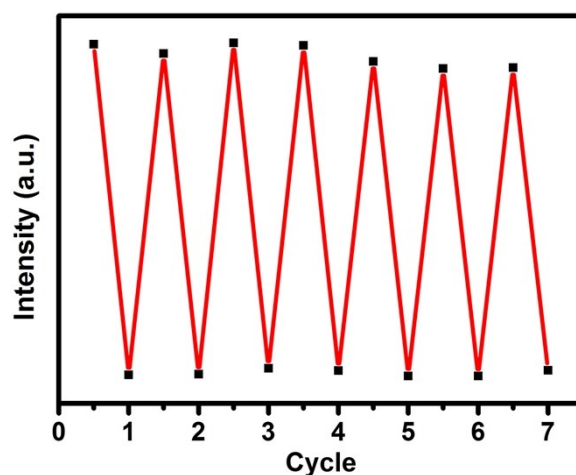

**Fig. S27** Reproducibility of the quenching ability of JLU-Liu45 dispersed in water in the presence of 1 mM aqueous solution of TNP.

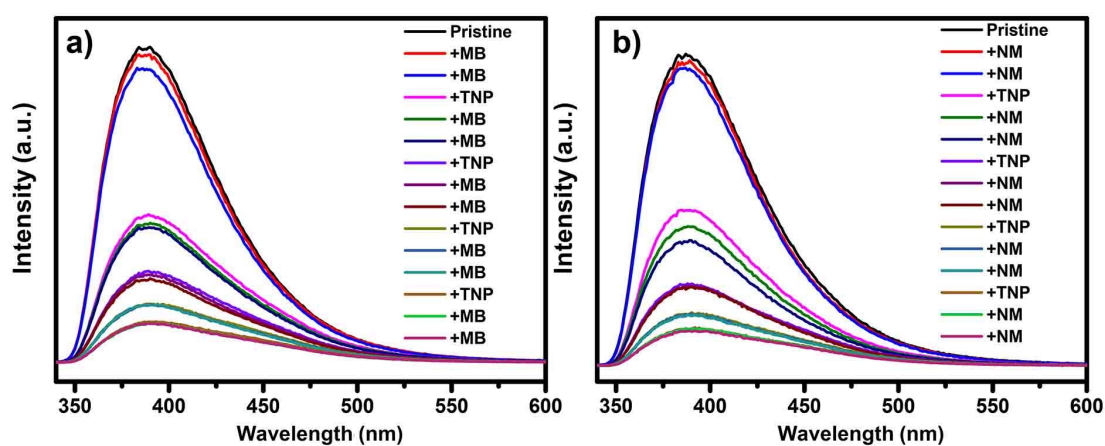

**Fig. S28** Tracked emission spectra of JLU-Liu45 upon the addition of 1 mM aqueous solution of a) MB b) NM followed by 1 mM aqueous solution of TNP, respectively (20  $\mu$ L addition each time).

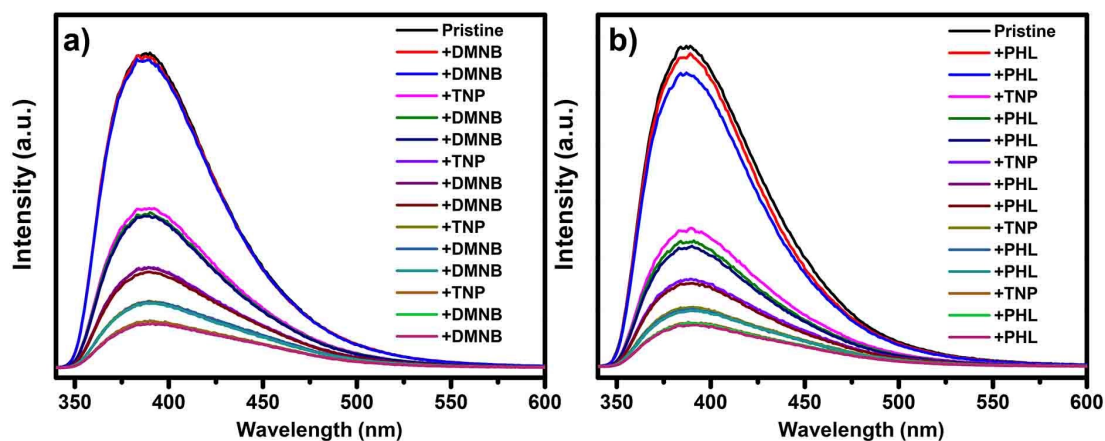

Fig. S29 Tracked emission spectra of JLU-Liu45 upon the addition of 1 mM aqueous solution of a) DMNB b) PHL followed by 1 mM aqueous solution of TNP, respectively (20  $\mu$ L addition each time).

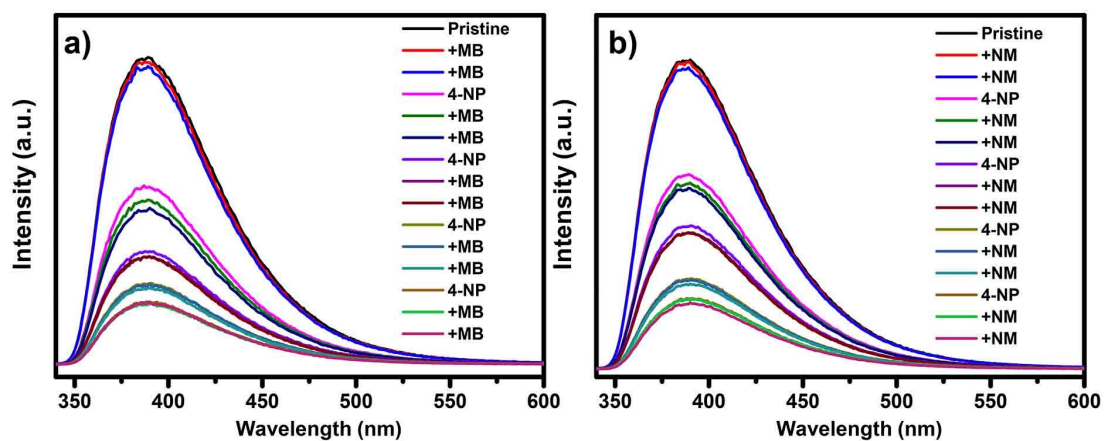

Fig. S30 Tracked emission spectra of JLU-Liu45 upon the addition of 1 mM aqueous solution of a) MB b) NM followed by 1 mM aqueous solution of 4-NP, respectively (20  $\mu$ L addition each time).

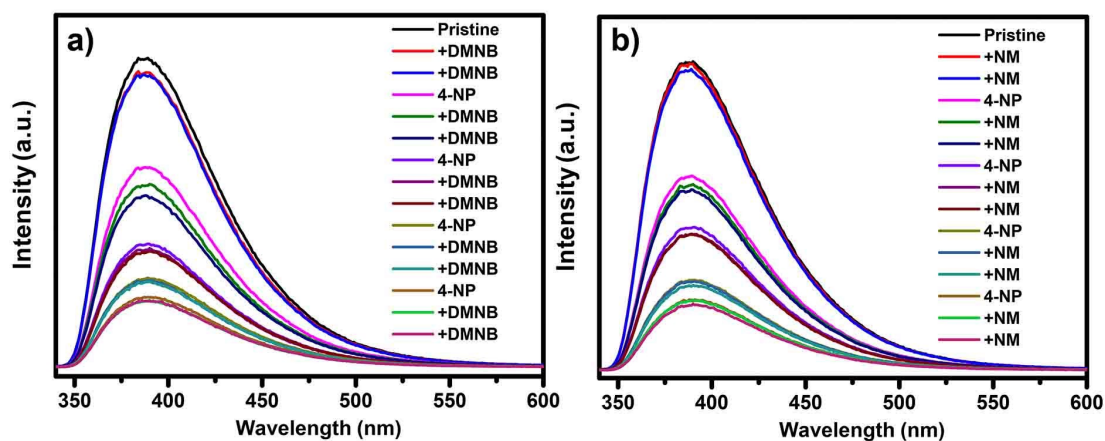

Fig. S31 Tracked emission spectra of JLU-Liu45 upon the addition of 1 mM aqueous solution of a) DMNB b) PHL followed by 1 mM aqueous solution of 4-NP, respectively (20  $\mu$ L addition each time).

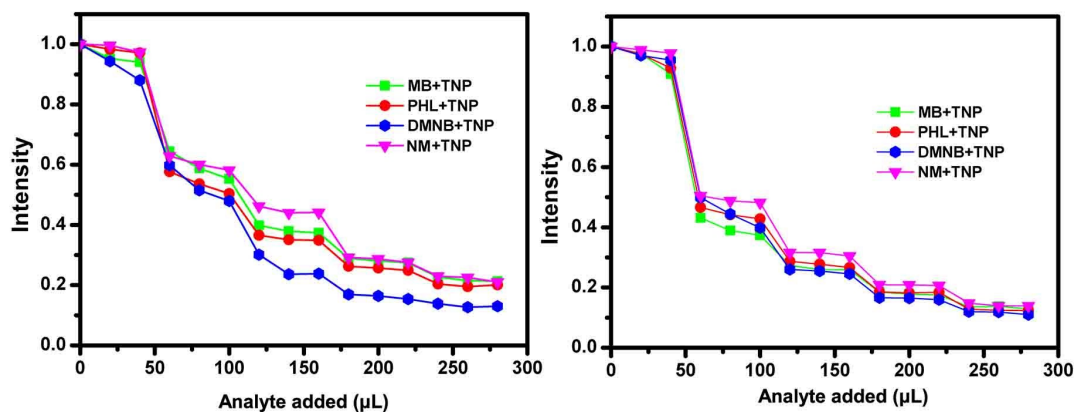

**Fig. S32** The selective detection of 4-NP a) and TNP b) on **JLU-Liu45** in the presence of PHL, MB, NM or DMNB in water.

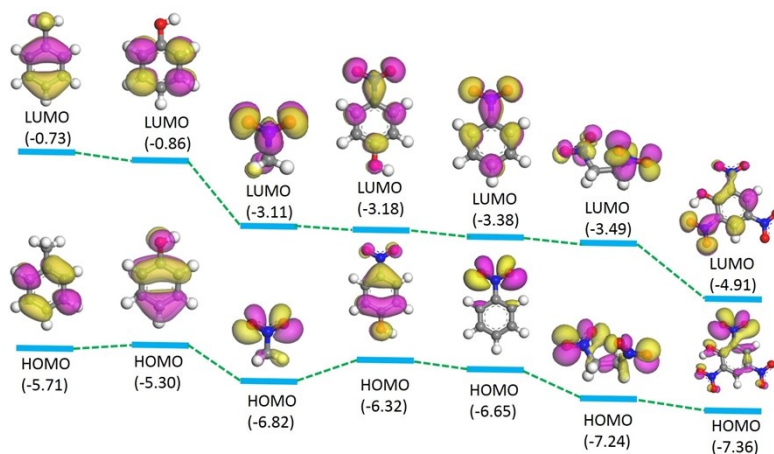

**Fig. S33** DFT-calculated HOMO-LUMO energy profiles of MB, PHL, NM, 4-NP, NB, DMNB and TNP (from left to right).

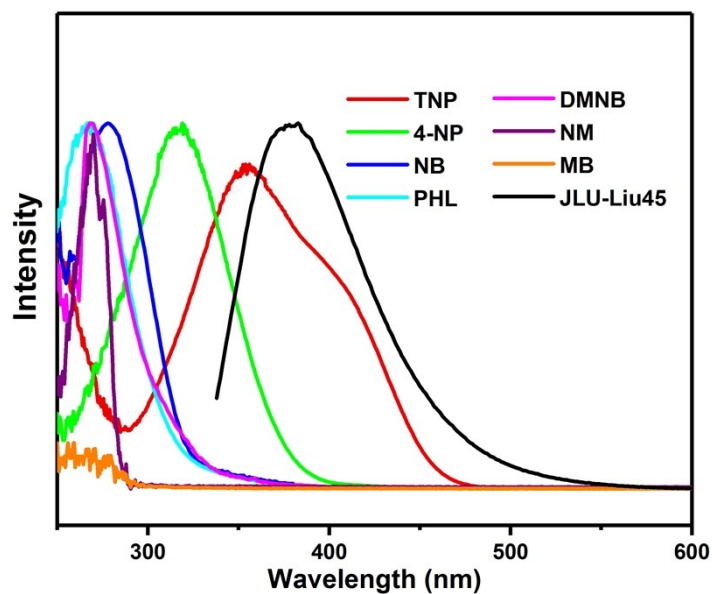

**Fig. S34** Spectral overlap between normalized absorption spectra of selected organic explosives and the normalization emission spectrum of **JLU-Liu45**.



## 9. Tables

**Table S1.** Crystal data and structure refinement for **JLU-Liu45**

| Compound                                                | JLU-Liu45                                                                       |
|---------------------------------------------------------|---------------------------------------------------------------------------------|
| formula                                                 | C <sub>126</sub> H <sub>92</sub> N <sub>2</sub> O <sub>35</sub> Zr <sub>6</sub> |
| formula weight                                          | 2741.34                                                                         |
| temp (K)                                                | 296(2) K                                                                        |
| wavelength (Å)                                          | 0.71073 Å                                                                       |
| crystal system, space group                             | Trigonal, R-3                                                                   |
| <i>a</i> (Å)                                            | 30.487(4)                                                                       |
| <i>b</i> (Å)                                            | 30.487(4)                                                                       |
| <i>c</i> (Å)                                            | 15.094(3)                                                                       |
| <i>V</i> (Å <sup>3</sup> )                              | 12150(3)                                                                        |
| <i>Z</i> , <i>D<sub>c</sub></i> (Mg/m <sup>3</sup> )    | 6, 1.124                                                                        |
| <i>F</i> (000)                                          | 4146                                                                            |
| θ range (deg)                                           | 1.34 to 25.08°                                                                  |
| reflns collected/unique                                 | 26385/4804                                                                      |
| <i>R<sub>int</sub></i>                                  | 0.0339                                                                          |
| data/restraints/params                                  | 4804/48/259                                                                     |
| GOF on <i>F</i> <sup>2</sup>                            | 1.069                                                                           |
| <i>R<sub>i</sub></i> , <i>wR<sub>2</sub></i> (I>2σ(I))  | <i>R<sub>1</sub></i> = 0.0413, <i>wR<sub>2</sub></i> = 0.1226                   |
| <i>R<sub>i</sub></i> , <i>wR<sub>2</sub></i> (all data) | <i>R<sub>1</sub></i> = 0.0478, <i>wR<sub>2</sub></i> = 0.1279                   |

**Table S2.** Selected bond lengths [Å] and angles [°] for **JLU-Liu45**.

| JLU-Liu45            |            |                  |           |
|----------------------|------------|------------------|-----------|
| Zr(1)-O(5')#1        | 1.959(6)   | C(3)-C(4)        | 1.400(7)  |
| Zr(1)-O(5')          | 2.097(5)   | C(3)-C(14)       | 1.475(6)  |
| Zr(1)-O(5')#2        | 2.098(5)   | C(5)-C(6)        | 1.386(6)  |
| Zr(1)-O(6)           | 2.1341(16) | C(7)-C(12)       | 1.380(6)  |
| Zr(1)-O(2)#1         | 2.235(2)   | C(17)-C(18)      | 1.369(5)  |
| Zr(1)-O(5)           | 2.237(5)   | C(17)-C(20)      | 1.502(5)  |
| C(1)-C(6)            | 1.381(7)   | C(5)-C(4)-C(3)   | 120.9(4)  |
| C(1)-C(2)            | 1.389(6)   | C(4)-C(3)-C(14)  | 120.1(4)  |
| O(5')-Zr(1)-O(6)     | 1.931(4)   | C(4)-C(5)-C(6)   | 120.4(5)  |
| O(5')-Zr(1)#7        | 2.098(5)   | C(12)-C(7)-C(8)  | 116.9(12) |
| O(1)-Zr(1)-O(5)#2    | 142.21(16) | O(4)-C(20)-O(3)  | 127.3(3)  |
| O(5')#1-Zr(1)-O(3)#3 | 141.73(16) | O(4)-C(20)-C(17) | 116.4(3)  |
| O(5')-Zr(1)-O(3)#3   | 143.00(17) | O(3)-C(20)-C(17) | 116.3(3)  |
| O(5')#2-Zr(1)-O(3)#3 | 86.01(17)  | O(1)-C(13)-O(2)  | 127.0(3)  |
| O(6)-Zr(1)-O(3)#3    | 77.22(12)  | O(1)-C(13)-C(10) | 116.4(3)  |
| O(1)-Zr(1)-O(3)#3    | 120.78(9)  | C(8)-C(7)-C(8')  | 22.0(14)  |

Symmetry transformations used to generate equivalent atoms:

#1 *y*, -*x*+*y*, -*z* #2 -*x*+*y*, -*x*, *z* #3 *x*-*y*+1/3, *x*-1/3, -*z*+2/3 #4 -*x*+1/3, -*y*+2/3, -*z*+2/3 #5 *x*-*y*, *x*, -*z*  
 #6 *y*+1/3, -*x*+*y*+2/3, -*z*+2/3

**Table S3** Force fields parameters of the GCMC simulations.

| Atom | $\sigma$ (Å) | $\epsilon/k_B$ (K) |
|------|--------------|--------------------|
| Zr   | 2.783        | 34.691             |
| C    | 3.473        | 47.813             |
| O    | 3.033        | 48.115             |
| H    | 2.846        | 7.642              |

**Table S4** Atomic partial charges of JLU-Liu45 for the GCMC simulations.

| JLU-Liu45 |         |     |         |      |         |      |         |
|-----------|---------|-----|---------|------|---------|------|---------|
| Zr1       | 0.4989  | C61 | -0.0518 | C121 | -0.0169 | C181 | -0.0596 |
| O2        | -0.1974 | H62 | 0.04    | C122 | -0.0626 | H182 | 0.0325  |
| O3        | -0.1984 | C63 | -0.0672 | H123 | 0.0373  | C183 | -0.0457 |
| O4        | -0.1995 | H64 | 0.0372  | C124 | -0.0121 | H184 | 0.0394  |
| O5        | -0.198  | C65 | 0.1801  | C125 | -0.0504 | C185 | -0.0183 |
| O6        | -0.3316 | C66 | -0.0168 | H126 | 0.0459  | C186 | -0.0487 |
| C7        | -0.0169 | C67 | -0.0596 | C127 | -0.0484 | H187 | 0.0432  |
| C8        | -0.0626 | H68 | 0.0325  | H128 | 0.0551  | C188 | -0.0618 |
| H9        | 0.0373  | C69 | -0.0457 | C129 | -0.0631 | H189 | 0.0385  |
| C10       | -0.0121 | H70 | 0.0394  | H130 | 0.0406  | C190 | 0.1837  |
| C11       | -0.0504 | C71 | -0.0183 | C131 | -0.0201 | Z191 | 0.4989  |
| H12       | 0.0459  | C72 | -0.0487 | C132 | -0.0658 | O192 | -0.1973 |
| C13       | -0.0484 | H73 | 0.0432  | H133 | 0.036   | O193 | -0.1985 |
| H14       | 0.0551  | C74 | -0.0618 | C134 | -0.0502 | O194 | -0.1995 |
| C15       | -0.0631 | H75 | 0.0385  | H135 | 0.0417  | O195 | -0.198  |
| H16       | 0.0406  | C76 | 0.1837  | C136 | -0.0215 | O196 | -0.3317 |
| C17       | -0.0201 | Z77 | 0.4989  | C137 | -0.0517 | C197 | -0.0169 |
| C18       | -0.0658 | O78 | -0.1973 | H138 | 0.0401  | C198 | -0.0625 |
| H19       | 0.036   | O79 | -0.1985 | C139 | -0.0672 | H199 | 0.0373  |
| C20       | -0.0502 | O80 | -0.1995 | H140 | 0.0372  | C200 | -0.012  |
| H21       | 0.0417  | O81 | -0.198  | C141 | 0.1801  | C201 | -0.0504 |
| C22       | -0.0215 | O82 | -0.3317 | C142 | -0.0167 | H202 | 0.0459  |
| C23       | -0.0517 | C83 | -0.0169 | C143 | -0.0595 | C203 | -0.0483 |
| H24       | 0.0401  | C84 | -0.0625 | H144 | 0.0325  | H204 | 0.0552  |
| C25       | -0.0672 | H85 | 0.0373  | C145 | -0.0455 | C205 | -0.0631 |
| H26       | 0.0372  | C86 | -0.012  | H146 | 0.0393  | H206 | 0.0406  |
| C27       | 0.1801  | C87 | -0.0504 | C147 | -0.0182 | C207 | -0.02   |
| C28       | -0.0167 | H88 | 0.0459  | C148 | -0.0486 | C208 | -0.0657 |
| C29       | -0.0595 | C89 | -0.0483 | H149 | 0.0432  | H209 | 0.0361  |
| H30       | 0.0325  | H90 | 0.0552  | C150 | -0.0617 | C210 | -0.0501 |
| C31       | -0.0455 | C91 | -0.0631 | H151 | 0.0385  | H211 | 0.0418  |
| H32       | 0.0393  | H92 | 0.0406  | C152 | 0.1838  | C212 | -0.0214 |
| C33       | -0.0182 | C93 | -0.02   | Z153 | 0.4991  | C213 | -0.0517 |
| C34       | -0.0486 | C94 | -0.0657 | O154 | -0.1973 | H214 | 0.0401  |
| H35       | 0.0432  | H95 | 0.0361  | O155 | -0.1984 | C215 | -0.0671 |

|     |         |      |         |      |         |      |         |
|-----|---------|------|---------|------|---------|------|---------|
| C36 | -0.0617 | C96  | -0.0501 | O156 | -0.1994 | H216 | 0.0372  |
| H37 | 0.0385  | H97  | 0.0418  | O157 | -0.1981 | C217 | 0.1801  |
| C38 | 0.1838  | C98  | -0.0214 | O158 | -0.3317 | C218 | -0.0167 |
| Z39 | 0.4991  | C99  | -0.0517 | C159 | -0.0169 | C219 | -0.0594 |
| O40 | -0.1973 | H100 | 0.0401  | C160 | -0.0626 | H220 | 0.0324  |
| O41 | -0.1984 | C101 | -0.0671 | H161 | 0.0373  | C221 | -0.0456 |
| O42 | -0.1994 | H102 | 0.0372  | C162 | -0.0121 | H222 | 0.0393  |
| O43 | -0.1981 | C103 | 0.1801  | C163 | -0.0504 | C223 | -0.0182 |
| O44 | -0.3317 | C104 | -0.0167 | H164 | 0.0459  | C224 | -0.0485 |
| C45 | -0.0169 | C105 | -0.0594 | C165 | -0.0484 | H225 | 0.0431  |
| C46 | -0.0626 | H106 | 0.0324  | H166 | 0.0551  | C226 | -0.0617 |
| H47 | 0.0373  | C107 | -0.0456 | C167 | -0.0632 | H227 | 0.0385  |
| C48 | -0.0121 | H108 | 0.0393  | H168 | 0.0406  | C228 | 0.1837  |
| C49 | -0.0504 | C109 | -0.0182 | C169 | -0.0201 | O229 | -0.3337 |
| H50 | 0.0459  | C110 | -0.0485 | C170 | -0.0659 | O230 | -0.3337 |
| C51 | -0.0484 | H111 | 0.0431  | H171 | 0.036   |      |         |
| H52 | 0.0551  | C112 | -0.0617 | C172 | -0.0502 |      |         |
| C53 | -0.0632 | H113 | 0.0385  | H173 | 0.0417  |      |         |
| H54 | 0.0406  | C114 | 0.1837  | C174 | -0.0215 |      |         |
| C55 | -0.0201 | Z115 | 0.4989  | C175 | -0.0518 |      |         |
| C56 | -0.0659 | O116 | -0.1974 | H176 | 0.04    |      |         |
| H57 | 0.036   | O117 | -0.1984 | C177 | -0.0672 |      |         |
| C58 | -0.0502 | O118 | -0.1995 | H178 | 0.0372  |      |         |
| H59 | 0.0417  | O119 | -0.198  | C179 | 0.1801  |      |         |
| C60 | -0.0215 | O120 | -0.3316 | C180 | -0.0168 |      |         |

**Table S5** A comparison of chemical stability of JLU-Liu45 with other stable Zr-MOFs materials.

| Compound  | pH values | Reference |
|-----------|-----------|-----------|
| JLU-Liu45 | 0-11      | This work |
| PCN-223   | 0-10      | 1         |
| PCN-777   | 3-11      | 2         |
| PCN-56    | 2-11      | 3         |
| PCN-59    | 2-11      | 3         |
| PCN-225   | 0-12      | 4         |
| BUT-12    | 0-10      | 5         |
| BUT-13    | 0-10      | 5         |
| BUT-14    | 0-10      | 6         |
| BUT-15    | 0-10      | 6         |
| NPF-200   | 1-12      | 7         |
| PCN-134   | 0-13      | 8         |

**Table S6.** CO<sub>2</sub> adsorption capacities and  $Q_{st}$  values in reported Zr-MOFs at 273 K and 1 bar.

| Zr-MOFs                 | BET surface area (m <sup>2</sup> g <sup>-1</sup> ) | CO <sub>2</sub> uptake (273 K, cm <sup>3</sup> g <sup>-1</sup> ) | CO <sub>2</sub> uptake (298 K) | $Q_{st}$ values (kJ mol <sup>-1</sup> ) | Ref.             |
|-------------------------|----------------------------------------------------|------------------------------------------------------------------|--------------------------------|-----------------------------------------|------------------|
| <b>JLU-Liu45</b>        | <b>971</b>                                         | <b>116</b>                                                       | <b>66</b>                      | <b>34</b>                               | <b>This work</b> |
| BUT-10                  | 1310                                               | 92                                                               | 53.5                           | 22                                      | 9                |
| BUT-11                  | 1848                                               | 89                                                               | 50.6                           | 26                                      | 9                |
| UiO-67                  | 2505                                               | N.A.                                                             | 22.9                           | 16                                      | 9                |
| 493-MOF-TATB            | 820                                                | 97                                                               | 60                             | 25                                      | 10               |
| 493-MOF-BA              | 1265                                               | 78                                                               | 50                             | 23                                      | 10               |
| 493-MOF-NA              | 1199                                               | 85                                                               | 56                             | 20                                      | 10               |
| LIFM-28np               | 940                                                | 29.0                                                             | N.A.                           | 22                                      | 11               |
| LIFM-79                 | 1689                                               | 76.3                                                             | ~42                            | 32                                      | 11               |
| LIFM-77                 | 1619                                               | 81.0                                                             | ~44                            | 34                                      | 11               |
| PCN-56                  | 3741                                               | ~58                                                              | ~37 <sup>a</sup>               | 20                                      | 3                |
| PCN-57                  | 2572                                               | ~50                                                              | ~33 <sup>a</sup>               | 22                                      | 3                |
| PCN-58                  | 2185                                               | ~63                                                              | ~40 <sup>a</sup>               | 24                                      | 3                |
| PCN-59                  | 1279                                               | ~71                                                              | ~42 <sup>a</sup>               | 32                                      | 3                |
| NU-1000                 | 2320                                               | N.A.                                                             | ~40 <sup>b</sup>               | 17                                      | 12               |
| SALI-9                  | 870                                                | N.A.                                                             | ~18 <sup>b</sup>               | 34                                      | 12               |
| SALI-1'                 | 1600                                               | N.A.                                                             | ~34 <sup>b</sup>               | 21                                      | 12               |
| CPM-99(H <sub>2</sub> ) | N.A.                                               | 73                                                               | ~50                            | N.A.                                    | 13               |
| CPM-99(Zn)              | N.A.                                               | 60                                                               | ~35                            | N.A.                                    | 13               |
| CPM-99(Co)              | N.A.                                               | 61                                                               | ~42                            | N.A.                                    | 13               |
| CPM-99(Fe)              | 1030                                               | 76                                                               | ~45                            | N.A.                                    | 13               |
| MOF-892                 | 1431                                               | ~41                                                              | ~22                            | 24                                      | 14               |
| MOF-893                 | 558                                                | ~40                                                              | ~21                            | 31                                      | 14               |
| JLU-MOF50               | 1101                                               | 69                                                               | 35                             | 25                                      | 15               |
| JLU-MOF58               | 3663                                               | 49                                                               | 28                             | 19                                      | 16               |
| Corrole-MOF-1           | 2545                                               | 76                                                               | 46                             | N.A.                                    | 17               |
| PCN-138                 | 1261                                               | 63                                                               | 41                             | N.A.                                    | 18               |
| MIP-203-F               | 430                                                | 61                                                               | 46                             | 32                                      | 19               |
| MIP-203-S               | no                                                 | 36                                                               | 15                             | 34                                      | 19               |
| MIP-203-M               | 380                                                | 48                                                               | 36                             | 33                                      | 19               |

<sup>a</sup>at 296 K, <sup>b</sup>at 293 K.

**Table S7.** Gas adsorption data for **JLU-Liu45**.

| Compound         | N <sub>2</sub> <sup>a</sup> |       | CO <sub>2</sub> <sup>a</sup> |       | CH <sub>4</sub> <sup>a</sup> |       |       |
|------------------|-----------------------------|-------|------------------------------|-------|------------------------------|-------|-------|
|                  | 77 K                        | 298 K | 195 K                        | 273 K | 298 K                        | 273 K | 298 K |
| <b>JLU-Liu45</b> | 256                         | 3     | 216                          | 116   | 66                           | 27    | 16    |

  

| Compound         | C <sub>2</sub> H <sub>6</sub> <sup>a</sup> |       | C <sub>3</sub> H <sub>8</sub> <sup>a</sup> |       | H <sub>2</sub> O |
|------------------|--------------------------------------------|-------|--------------------------------------------|-------|------------------|
|                  | 273 K                                      | 298 K | 273 K                                      | 298 K | 298 K            |
| <b>JLU-Liu45</b> | 85                                         | 65    | 74                                         | 63    | 0.16 mg/mg       |

<sup>a</sup> Gas uptake in cm<sup>3</sup> g<sup>-1</sup>.

**Table S8.** Comparison of CO<sub>2</sub>/N<sub>2</sub> (0.15/0.85) selectivity of **JLU-Liu45** with other stable MOFs.

| Zr-MOFs                          | CO <sub>2</sub> /N <sub>2</sub> selectivity | Ref.             |
|----------------------------------|---------------------------------------------|------------------|
| <b>JLU-Liu45</b>                 | <b>81.4</b>                                 | <b>This work</b> |
| MIL-101                          | 12.6                                        | 20               |
| MIL-125-NH <sub>2</sub>          | 27.0                                        | 21               |
| MIL-68-Al                        | 37.0                                        | 22               |
| ZIF-68                           | 18.0                                        | 23               |
| ZIF-69                           | 20.0                                        | 23               |
| ZIF-70                           | 17.0                                        | 23               |
| ZIF-79                           | 23.0                                        | 23               |
| ZIF-81                           | 24.0                                        | 23               |
| ZIF-95                           | 18.0                                        | 24               |
| UiO-66(Br)                       | 25.1                                        | 25               |
| UiO-66(NO <sub>2</sub> )         | 26.4                                        | 25               |
| UiO-66                           | 13.4                                        | 25               |
| UiO-67                           | 9.4                                         | 9                |
| BUT-10                           | 18.6                                        | 9                |
| BUT-11                           | 31.5                                        | 9                |
| BUT-11(AcOH)                     | 24.1                                        | 26               |
| LIFM-77                          | 34.7                                        | 11               |
| LIFM-79                          | 25.2                                        | 11               |
| LIFM-28np                        | 5.5                                         | 11               |
| MIP-203-F                        | 15                                          | 19               |
| MIP-203-S                        | 34                                          | 19               |
| MIP-203-M                        | 51                                          | 19               |
| UiO-66(Zr)-(OH) <sub>2</sub>     | 66                                          | 27               |
| UiO-66(Zr)-(OAc) <sub>2</sub>    | 42.5                                        | 27               |
| UiO-66(Zr)-(OPr) <sub>2</sub>    | 39.1                                        | 27               |
| Opt-UiO-66(Zr)-(OH) <sub>2</sub> | 44.5                                        | 28               |
| UiO-66-NH <sub>2</sub>           | 32.3                                        | 29               |
| UiO-66(Zr)-(COOH) <sub>2</sub>   | 35.4                                        | 30               |
| 75PEI@meso-UiO-66-0.2Cu          | 59.4                                        | 31               |
| UiO-66(Zr)-(COOK) <sub>2</sub>   | 69.3                                        | 32               |
| UiO-66(Zr)-(COONa) <sub>2</sub>  | 58.0                                        | 32               |

**Table S9.** Comparison of CO<sub>2</sub>/CH<sub>4</sub> (0.5/0.5) selectivity of **JLU-Liu45** with other MOFs materials.

| MOFs material                      | CO <sub>2</sub> /CH <sub>4</sub> selectivity | Ref.      |
|------------------------------------|----------------------------------------------|-----------|
| JLU-Liu45                          | 7.0                                          | This work |
| MOF-177                            | 0.9                                          | 33        |
| ZIF-8                              | 1.4                                          | 33        |
| Cu <sub>3</sub> (BTC) <sub>2</sub> | 2.3                                          | 33        |
| NOTT-125                           | 4.8                                          | 34        |
| FJI-C1                             | 5.9                                          | 35        |
| ZJNU-59                            | 6.0                                          | 36        |
| NOTT-122                           | 6.4                                          | 37        |
| ZJNU-40                            | 6.6                                          | 38        |
| ZJNU-69                            | 7.1                                          | 39        |
| BSF-1                              | 7.5                                          | 40        |
| MFM-126                            | 11.7                                         | 41        |
| SNIFSIX-1-Cu                       | 12.1                                         | 42        |

**Table S10.** Comparison of detection ability of **JLU-Liu45** towards TNP in the water with other materials.

| Material                                                                                                   | Quenching constant (K <sub>SV</sub> ) for TNP | Ref.             |
|------------------------------------------------------------------------------------------------------------|-----------------------------------------------|------------------|
| <b>JLU-Liu45</b>                                                                                           | <b>2.3 × 10<sup>5</sup> M<sup>-1</sup></b>    | <b>This work</b> |
| UiO-67@N                                                                                                   | 2.9 × 10 <sup>4</sup> M <sup>-1</sup>         | 43               |
| [Eu <sub>3</sub> (L) <sub>3</sub> (HCOO)(μ <sub>3</sub> -OH) <sub>2</sub> (H <sub>2</sub> O)] · x(solvent) | 2.1 × 10 <sup>4</sup> M <sup>-1</sup>         | 44               |
| UiO-68@NH <sub>2</sub>                                                                                     | 5.8 × 10 <sup>4</sup> M <sup>-1</sup>         | 45               |
| BUT-12                                                                                                     | 3.1 × 10 <sup>5</sup> M <sup>-1</sup>         | 5                |
| BUT-13                                                                                                     | 5.1 × 10 <sup>5</sup> M <sup>-1</sup>         | 5                |
| [Cd(NDC)L] <sub>2</sub> · H <sub>2</sub> O                                                                 | 3.7 × 10 <sup>4</sup> M <sup>-1</sup>         | 46               |
| [Zn <sub>4</sub> (DMF)(Ur) <sub>2</sub> (NDC) <sub>4</sub> ]                                               | 10.8 × 10 <sup>4</sup> M <sup>-1</sup>        | 47               |
| [Zn <sub>8</sub> (ad) <sub>4</sub> (BPDC) <sub>6</sub> O · 2Me <sub>2</sub> NH <sub>2</sub> ] · G          | 4.6 × 10 <sup>4</sup> M <sup>-1</sup>         | 48               |
| [Zn(NDC)(H <sub>2</sub> O)] <sub>n</sub>                                                                   | 6 × 10 <sup>4</sup> M <sup>-1</sup>           | 49               |
| [Cd(NDC) <sub>0.5</sub> (PCA)] · xG                                                                        | 3.5 × 10 <sup>4</sup> M <sup>-1</sup>         | 50               |
| In-ADBA                                                                                                    | 1.3 × 10 <sup>5</sup> M <sup>-1</sup>         | 51               |
| [Tb <sub>2</sub> (H <sub>2</sub> L) <sub>3</sub> (H <sub>2</sub> O) <sub>2</sub> ] · 21H <sub>2</sub> O    | 1.5 × 10 <sup>4</sup> M <sup>-1</sup>         | 52               |
| [Cd <sub>2</sub> (tdz) <sub>2</sub> (4,4'-bpy) <sub>2</sub> ] · 6.5H <sub>2</sub> O                        | 4.9 × 10 <sup>4</sup> M <sup>-1</sup>         | 53               |
| TFPC-NDA-COF                                                                                               | 2.5 × 10 <sup>5</sup> M <sup>-1</sup>         | 54               |

## 10. REFERENCES

1. D. Feng, Z. Y. Gu, Y. P. Chen, J. Park, Z. Wei, Y. Sun, M. Bosch, S. Yuan and H. C. Zhou, *J. Am. Chem. Soc.*, 2014, **136**, 17714-17717.
2. D. Feng, K. Wang, J. Su, T. F. Liu, J. Park, Z. Wei, M. Bosch, A. Yakovenko, X. Zou and H. C. Zhou, *Angew. Chem. Int. Ed.*, 2015, **54**, 149-154.
3. H. L. Jiang, D. Feng, T. F. Liu, J. R. Li and H. C. Zhou, *J. Am. Chem. Soc.*, 2012, **134**, 14690-14693.
4. H. L. Jiang, D. Feng, K. Wang, Z. Y. Gu, Z. Wei, Y. P. Chen and H. C. Zhou, *J. Am. Chem. Soc.*, 2013, **135**, 13934-13938.
5. B. Wang, X. L. Lv, D. Feng, L. H. Xie, J. Zhang, M. Li, Y. Xie, J. R. Li and H. C. Zhou, *J. Am.*

- Chem. Soc.*, 2016, **138**, 6204-6216.
6. B. Wang, Q. Yang, C. Guo, Y. Sun, L. H. Xie and J. R. Li, *ACS Appl. Mater. Interfaces*, 2017, **9**, 10286-10295.
  7. X. Zhang, X. Zhang, J. A. Johnson, Y. S. Chen and J. Zhang, *J. Am. Chem. Soc.*, 2016, **138**, 8380-8383.
  8. S. Yuan, J. S. Qin, L. Zou, Y. P. Chen, X. Wang, Q. Zhang and H. C. Zhou, *J. Am. Chem. Soc.*, 2016, **138**, 6636-6642.
  9. B. Wang, H. Huang, X. L. Lv, Y. Xie, M. Li and J. R. Li, *Inorg. Chem.*, 2014, **53**, 9254-9259.
  10. C. S. Liu, Z. H. Zhang, M. Chen, H. Zhao, F. H. Duan, D.-M. Chen, M. H. Wang, S. Zhang and M. Du, *Chem. Commun.*, 2017, **53**, 3941-3944.
  11. C. X. Chen, Z. W. Wei, J. J. Jiang, S. P. Zheng, H. P. Wang, Q. F. Qiu, C. C. Cao, D. Fenske and C. Y. Su, *J. Am. Chem. Soc.*, 2017, **139**, 6034-6037.
  12. P. Deria, J. E. Mondloch, E. Tylianakis, P. Ghosh, W. Bury, R. Q. Snurr, J. T. Hupp and O. K. Farha, *J. Am. Chem. Soc.*, 2013, **135**, 16801-16804.
  13. Q. Lin, X. Bu, A. Kong, C. Mao, X. Zhao, F. Bu and P. Feng, *J. Am. Chem. Soc.*, 2015, **137**, 2235-2238.
  14. P. T. K. Nguyen, H. T. D. Nguyen, H. N. Nguyen, C. A. Trickett, Q. T. Ton, E. Gutiérrez-Puebla, M. A. Monge, K. E. Cordova and F. Gándara, *ACS Appl. Mater. Interfaces*, 2018, **10**, 733-744.
  15. X. Sun, S. Yao, C. Yu, G. Li, C. Liu, Q. Huo and Y. Liu, *J. Mater. Chem. A*, 2018, **6**, 6363-6369.
  16. X. Sun, J. Gu, Y. Yuan, C. Yu, J. Li, H. Shan, G. Li and Y. Liu, *Inorg. Chem.*, 2019, **58**, 7480-7487.
  17. Y. Zhao, S. Qi, Z. Niu, Y. Peng, C. Shan, G. Verma, L. Wojtas, Z. Zhang, B. Zhang, Y. Feng, Y.-S. Chen and S. Ma, *J. Am. Chem. Soc.*, 2019, **141**, 14443-14450.
  18. Y.-C. Qiu, S. Yuan, X.-X. Li, D.-Y. Du, C. Wang, J.-S. Qin, H. F. Drake, Y.-Q. Lan, L. Jiang and H.-C. Zhou, *J. Am. Chem. Soc.*, 2019, **141**, 13841-13848.
  19. S. Wang, N. Khaferaj, M. Wahiduzzaman, K. Oyekan, X. Li, K. Wei, B. Zheng, A. Tissot, J. Marrot, W. Shepard, C. Martineau-Corcus, Y. Filinchuk, K. Tan, G. Maurin and C. Serre, *J. Am. Chem. Soc.*, 2019, **141**, 17207-17216.
  20. K. Munusamy, G. Sethia, D. V. Patil, P. B. Somayajulu Rallapalli, R. S. Somani and H. C. Bajaj, *Chem. Eng. J.*, 2012, **195-196**, 359-368.
  21. S. N. Kim, J. Kim, H. Y. Kim, H. Y. Cho and W. S. Ahn, *Catal. Today*, 2013, **204**, 85-93.
  22. Q. Yang, S. Vaesen, M. Vishnuvarthan, F. Ragon, C. Serre, A. Vimont, M. Daturi, G. De Weireld and G. Maurin, *J. Mater. Chem.*, 2012, **22**, 10210-10220.
  23. R. Banerjee, H. Furukawa, D. Britt, C. Knobler, M. O'Keeffe and O. M. Yaghi, *J. Am. Chem. Soc.*, 2009, **131**, 3875-3877.
  24. B. Wang, A. P. Côté, H. Furukawa, M. O'Keeffe and O. M. Yaghi, *Nature*, 2008, **453**, 207.
  25. W. Zhang, H. Huang, C. Zhong and D. Liu, *PCCP*, 2012, **14**, 2317-2325.
  26. P. Xydias, I. Spanopoulos, E. Klontzas, G. E. Froudakis and P. N. Trikalitis, *Inorg. Chem.*, 2014, **53**, 679-681.
  27. Y. Wang, Z. Hu, T. Kundu, Y. Cheng, J. Dong, Y. Qian, L. Zhai and D. Zhao, *ACS Sustainable Chem. Eng.*, 2018, **6**, 11904-11912.
  28. Z. Hu, Y. Wang, S. Farooq and D. Zhao, *AIChE J.*, 2017, **63**, 4103-4114.
  29. G. E. Cmarik, M. Kim, S. M. Cohen and K. S. Walton, *Langmuir*, 2012, **28**, 15606-15613.
  30. Z. Hu, Y. Peng, Z. Kang, Y. Qian and D. Zhao, *Inorg. Chem.*, 2015, **54**, 4862-4868.

31. Z. Li, H. Chen, C. Chen, Q. Guo, X. Li, Y. He, H. Wang, N. Feng, H. Wan and G. Guan, *Chem. Eng. J.*, 2019, 375, 121962.
32. Z. Hu, M. Khurana, Y. H. Seah, M. Zhang, Z. Guo and D. Zhao, *Chem. Eng. Sci.*, 2015, 124, 61-69.
33. Z. Xiang, X. Peng, X. Cheng, X. Li and D. Cao, *J. Phys. Chem. C*, 2011, 115, 19864-19871.
34. N. H. Alsmail, M. Suyetin, Y. Yan, R. Cabot, C. P. Krap, J. Lü, T. L. Easun, E. Bichoutskaia, W. Lewis, A. J. Blake and M. Schröder, *Chem. Eur. J.*, 2014, 20, 7317-7324.
35. Y. Huang, Z. Lin, H. Fu, F. Wang, M. Shen, X. Wang and R. Cao, *ChemSusChem*, 2014, 7, 2647-2653.
36. Y. Wang, M. He, X. Gao, S. Li, S. Xiong, R. Krishna and Y. He, *ACS Appl. Mater. Interfaces.*, 2018, 10, 20559-20568.
37. Y. Yan, M. Suyetin, E. Bichoutskaia, A. J. Blake, D. R. Allan, S. A. Barnett and M. Schröder, *Chem. Sci.*, 2013, 4, 1731-1736.
38. C. Song, Y. He, B. Li, Y. Ling, H. Wang, Y. Feng, R. Krishna and B. Chen, *Chem. Commun.*, 2014, 50, 12105-12108.
39. F. Chen, Y. Wang, D. Bai, M. He, X. Gao and Y. He, *J. Mater. Chem. A.*, 2018, 6, 3471-3478.
40. Y. Zhang, L. Yang, L. Wang, S. Duttwyler and H. Xing, *Angew. Chem. Int. Ed.*, 2019, 58, 8145-8150.
41. J. D. Humby, O. Benson, G. L. Smith, S. P. Argent, I. da Silva, Y. Cheng, S. Rudić, P. Manuel, M. D. Frogley, G. Cinque, L. K. Saunders, I. J. Vitórica-Yrezábal, G. F. S. Whitehead, T. L. Easun, W. Lewis, A. J. Blake, A. J. Ramirez-Cuesta, S. Yang and M. Schröder, *Chem. Sci.*, 2019, 10, 1098-1106.
42. P. Nugent, V. Rhodus, T. Pham, B. Tudor, K. Forrest, L. Wojtas, B. Space and M. Zaworotko, *Chem. Commun.*, 2013, 49, 1606-1608.
43. S. S. Nagarkar, A. V. Desai and S. K. Ghosh, *Chem. Commun.*, 2014, **50**, 8915-8918.
44. X.-Z. Song, S.-Y. Song, S.-N. Zhao, Z.-M. Hao, M. Zhu, X. Meng, L. L. Wu and H. J. Zhang, *Adv. Funct. Mater.*, 2014, **24**, 4034-4041.
45. S. S. Nagarkar, A. V. Desai, P. Samanta and S. K. Ghosh, *Dalton Trans.*, 2015, **44**, 15175-15180.
23. B. Wang, X. L. Lv, D. Feng, L. H. Xie, J. Zhang, M. Li, Y. Xie, J. R. Li and H. C. Zhou, *J. Am. Chem. Soc.*, 2016, **138**, 6204-6216.
46. B. Q. Song, C. Qin, Y. T. Zhang, X. S. Wu, L. Yang, K. Z. Shao and Z. M. Su, *Dalton Trans.*, 2015, **44**, 18386-18394.
47. S. Mukherjee, A. V. Desai, B. Manna, A. I. Inamdar and S. K. Ghosh, *Cryst. Growth Des.* 2015, **15**, 4627-4634.
48. B. Joarder, V. Desai Aamod, P. Samanta, S. Mukherjee and K. Ghosh Sujit, *Chem. Eur. J.*, 2015, **21**, 965-969.
49. P. Ghosh, K. Saha Sourav, A. Roychowdhury and P. Banerjee, *Eur. J. Inorg. Chem.*, 2015, **17**, 2851-2857.
50. S. Nagarkar Sanjog, B. Joarder, K. Chaudhari Abhijeet, S. Mukherjee and K. Ghosh Sujit, *Angew. Chem. Int. Ed.*, 2013, **125**, 2953-2957.
51. X. Liu, B. Liu, G. Li and Y. Liu, *J. Mater. Chem. A*, 2018, **6**, 17177-17185.
52. R. Fu, S. Hu and X. Wu, *J. Mater. Chem. A*, 2017, **5**, 1952-1956.
53. A. Gogia and S. K. Mandal, *Dalton Trans.* 2019, **48**, 2388-2398.
54. P. Das and S. K. Mandal, *J. Mater. Chem. A*, 2018, **6**, 16246-16256.
